# Supplementary material for: Biological iron-sulfur storage in a thioferrate-protein nanoparticle
Source: PubMed Central journal article supplement (PMC5524996; doi:10.1038/ncomms16110), 2017-07-20
Supplement: ncomms16110-s1.pdf [file ncomms16110-s1.pdf]

# SI GUIDE

File Name: Supplementary Information

File Description: Supplementary Figures, Supplementary Methods and Supplementary References.

File Name: Peer Review File

File Description:

## 1 **Supplementary Methods**

2 **XAS data acquisition and analysis.** Iron K-edge XAS data were collected on solutions of IssA  
3 in 50 mM Tris buffer in the presence of 30% glycerol, frozen in 1 mm × 3 mm × 23 mm acrylic  
4 sample cuvettes closed with metal free kapton adhesive tape. Data were collected using the  
5 Stanford Synchrotron Radiation Lightsource (SSRL) structural molecular biology XAS beamline  
6 7-3, employing a Si(220) double-crystal monochromator with harmonic rejection by setting the  
7 collimating mirror cut-off to 9 keV. Incident and transmitted X-ray intensities were monitored  
8 using N<sub>2</sub>-filled gas ionization chambers with a sweeping voltage of 1.8 kV, and X-ray absorption  
9 was measured as the iron K<sub>α12</sub> fluorescence excitation spectrum using an array of 30 germanium  
10 detectors equipped with a manganese filter and a Soller slit assembly. During data collection,  
11 samples were maintained at a temperature of approximately 10 K using an Oxford instruments  
12 liquid helium flow cryostat. For each iron K-edge data set, eight scans each of 40 min. duration  
13 were accumulated, and the energy was calibrated by reference to the absorption of a metallic iron  
14 foil measured simultaneously with each scan, assuming a lowest energy K- edge inflection point  
15 of 7,111.3 eV. The energy threshold of the extended X-ray absorption fine structure (EXAFS)  
16 oscillations ( $k = 0 \text{ \AA}^{-1}$ ) was assumed to be 7130.0 eV. Data were collected over the extended  $k$ -  
17 range to a maximum  $k$  of 18.2  $\text{\AA}^{-1}$ , in order to obtain the best resolution.

18 Sulfur K-edge XAS data were collected on frozen solutions using an Oxford Instruments  
19 helium cryostream apparatus at 20 K, yielding an estimated sample temperature of 20-50 K. The  
20 presence of the chlorine K-edge at 2,833 eV meant that the sample needed to be prepared in the  
21 absence of added chloride and sulfonate based buffers, and samples were contained in acrylic  
22 cuvettes closed with 6  $\mu\text{m}$  thick polypropylene windows to minimize attenuation of the X-ray  
23 beam. Sulfur K-edge XAS data were collected on SSRL beamline 4-3, using a Si(111)

24 monochromator and rejection of Si(333) and higher harmonics was achieved by setting the angle  
25 of the upstream vertically collimating mirror to give a high energy cutoff of ~5 keV. The  
26 incident X-ray intensity was measured with a helium filled gas ionization chamber with a  
27 sweeping voltage of 1 kV, and total fluorescence was measured by using a nitrogen-filled Stern-  
28 Heald-Lytle fluorescence ion chamber detector (The EXAFS Co., Pioche NV, USA). The  
29 incident X-ray energy was calibrated by reference to the lowest K-edge energy peak of a sodium  
30 thiosulfate (Na<sub>2</sub>S<sub>2</sub>O<sub>3</sub>) standard, assuming a peak energy of 2,469.2 eV as previously described<sup>1</sup>.  
31 The energy threshold of the extended X-ray absorption fine structure (EXAFS) oscillations ( $k = 0$   
32  $\text{\AA}^{-1}$ ) was assumed to be 2,475.0 eV. The high X-ray cross sections at the low X-ray energies of  
33 the sulfur K-edge mean that samples in such experiments are particularly prone to radiation  
34 damage<sup>2</sup>. The near-edge portion of the spectrum was monitored for changes indicative of  
35 radiation damage and only small changes were observed (Supplementary Figure 8). Sixteen  
36 scans each of 30 minutes duration from three different samples were averaged to obtain a final  
37 data set, with careful screening of data to remove scans with irreproducible features with a  
38 maximum number of 8 scans per sample. Sulfur K-edge EXAFS data were collected to a  
39 maximum  $k$  of 13.5  $\text{\AA}^{-1}$  because of truncation due to the presence of residual atmospheric argon  
40 which has a K-absorption edge at 3,205.9 eV. For both iron and sulfur K-edge data the program  
41 XAS collect was used to collect data<sup>3</sup>.

42  
43 **Expression and purification of the apo-IssA construct using *E. coli*.** The gene encoding IssA  
44 (PF2025) was amplified by PCR using *Pyrococcus furiosus* DSM 3638 genomic DNA isolated  
45 by ZymoBead Genomic DNA Kit (Zymo Research) and a set of primers, sense (5'-  
46 GGGCATATGAAGATAGCGATCCCAACTAATGGAGGAGG-3') and anti-sense (5-

47 GGGCTCGAGAGTTGCTACTTTAATTGCCTCTTCAACTGGAG-3'). Nde I and Xho I  
48 restriction enzyme sites were designed on the sense and anti-sense primers, respectively. The N-  
49 terminal 107 residues of PF2025 were amplified in order to remove the IssA tail in the  
50 recombinant form. The amplified DNA fragment and pET-24a(+) vector (Novagen) were  
51 digested by Nde I and Xho I and ligated by T4 DNA ligase (New England Biolabs). The  
52 assembled plasmid was transformed into XL1-blue *E. coli* competent cells for sequence  
53 confirmation. The plasmid was then transformed into the BL21-CodonPlus (DE3)-RIPL strain  
54 (Agilent Technologies) for protein expression. The *E. coli* transformant was grown at 37°C in  
55 2xYT medium with 20 µg/ml chloramphenicol and 50 µg/ml kanamycin to an OD<sub>600</sub> of 0.6-0.8.  
56 The protein expression was induced with 300 µM IPTG and switched to 25°C for 16 to 18 hours.  
57 Cells were harvested by centrifugation at 10,000 x *g* for 10 minutes and resuspended in 50 mM  
58 Tris, 300 mM NaCl, 2 mM DTT, pH 8.0 (buffer A) and complete protease inhibitor (Roche) at a  
59 ratio of 1 g wet cell wt. to 3 ml buffer. All the purification steps were carried out under anaerobic  
60 condition. Cells were lysed by 0.5 mg/ml lysozyme with stirring for 1 hour at room temperature.  
61 The mixture was frozen at -20°C overnight and thawed at room temperature for 2 hours. DNase I  
62 (0.002%, Sigma) was then added and stirred for 1 hour. After centrifugation at 7,500 rpm for 10  
63 minutes to remove cell debris and insoluble material, the supernatant was collected and applied  
64 to a column containing Ni Sepharose 6 Fast Flow (GE Healthcare Life Sciences), which was  
65 equilibrated with buffer A. The column was washed with buffer A and the adsorbed protein was  
66 eluted with 500 mM imidazole in buffer A. Protein purity was examined by SDS-PAGE.

67

68 **Phylogenetic analysis and structural model.** Metagenomic sequences and identical (duplicate)  
69 sequences were removed from the 5041 sequences containing the IPR003731 domain, and the

70 resulting 4630 sequences were aligned using Clustal Omega, version 1.2.1, with the default  
71 parameters<sup>4</sup>. TrimAl<sup>5</sup> was used to remove multiple alignment positions with greater than  
72 99.78% gaps (i.e. 10 or fewer sequences had sequence content at that position), and the resulting  
73 alignment was used to construct a maximum likelihood phylogenetic tree using IQ-Tree<sup>6</sup>  
74 (version 1.5.3). The IQ-Tree standard model selection test was used to automatically determine  
75 the best-fit model (WAG+G4: general amino acid matrix with a discrete Gamma model). This  
76 model tree was refined using ultrafast bootstrap approximation (UFBoot) and Shimodaira–  
77 Hasegawa-like approximate likelihood ratio tests with 1000 bootstrap replicates for each. iTol<sup>7</sup>  
78 was used for analysis and display of the phylogenetic tree. For visualization and clade selection,  
79 branch lengths were not used (e.g. cladogram) and branches with bootstrap confidence values  
80 less than 70% were removed. The COPid<sup>8,9</sup> server was used for amino acid analysis and pI was  
81 calculated with a custom program based on the ExPASy Compute pI/Mw algorithm<sup>8,9</sup>. The  
82 Phyre 2.0<sup>10</sup> server was used to thread model the IssA sequence on the homologous *M.*  
83 *thermautotrophicus* structure (PDB ID 1EO1).

84

All peptides queried (19)

| PF number     | ORF number | InterPro name                                         | MW (Da) | Expect value  | Peptide matches | Percent coverage |
|---------------|------------|-------------------------------------------------------|---------|---------------|-----------------|------------------|
| <b>PF2025</b> | 18978397   | <b>IssA</b>                                           | 18990   | <b>0.0047</b> | 5               | 27.9             |
| PF1027        | 18977399   | putative RNA methylase                                | 43494   | 3.9           | 6               | 16.1             |
| PF0938        | 18977310   | aconitase/3-isopropylmalate dehydratase large subunit | 46181   | 4.6           | 4               | 15.3             |
| PF0193        | 18976565   | ABC transporter-like                                  | 35846   | 5.4           | 3               | 21.6             |
| PF0738        | 18977110   | methyltransferase type 11                             | 21023   | 7.7           | 4               | 18.2             |
| PF1604        | 18977976   | cystathionine beta-synthase, core                     | 17979   | 7.9           | 3               | 25.2             |
| PF0920        | 18977292   | metal-dependent phosphohydrolase, HD region           | 25773   | 9.7           | 3               | 15.7             |
| PF1095        | 18977467   | NULL                                                  | 11453   | 12            | 2               | 37.9             |
| PF1612        | 18977984   | NULL                                                  | 9806    | 12            | 2               | 39.5             |
| PF1459        | 18977831   | L-fucose isomerase-like                               | 54272   | 14            | 4               | 8.5              |
| PF1335        | 18977707   | hydroxyethylthiazole kinase                           | 28309   | 15            | 3               | 15.1             |
| PF1379        | 18977751   | probable translation factor pelota                    | 40482   | 15            | 4               | 16.6             |
| PF0209        | 18976581   | lysine biosynthesis enzyme LysX                       | 30991   | 15            | 3               | 12.1             |
| PF0236        | 18976608   | phosphoribosyl pyrophosphokinase                      | 30928   | 16            | 3               | 14.7             |
| PF1807        | 18978179   | ribosomal protein L32e                                | 15525   | 19            | 2               | 28.5             |
| PF1128        | 18977500   | CRISPR-associated protein, TM1793                     | 36293   | 22            | 3               | 18               |
| PF2015        | 18978387   | DNA/RNA helicase, C-terminal                          | 86885   | 24            | 6               | 11               |
| PF0475        | 18976847   | initiation factor 2B related                          | 31078   | 31            | 3               | 13               |
| PF1896        | 18978268   | NULL                                                  | 28483   | 31            | 3               | 9.5              |
| PF1345        | 18977717   | ribonuclease Z                                        | 35105   | 35            | 3               | 16               |

85  
86 **Supplementary Table 1. Analysis of IssA immunoprecipitate for additional binding**  
87 **proteins.** The top twenty protein hits are shown from the resulting peptide masses after analysis  
88 using MASCOT software, searching a *Pyrococcus furiosus*-specific database, and allowing for 2  
89 missed cleavages and a mass difference of  $\pm 0.4$  Da. An expectation value of 0.05 or less is  
90 significant; significant expectation values are highlighted in bold.

91

92

| <b>Element</b> | <b>Atoms per IssA monomer</b> |
|----------------|-------------------------------|
| Fe             | 38.73 ± 3.60                  |
| Zn             | 1.33 ± 0.13                   |
| Cu             | 0.68 ± 0.06                   |
| Mg             | 0.24 ± 0.08                   |
| Co             | 0.14 ± 0.01                   |

93

94 **Supplementary Table 2. Elemental composition of IssA purified from *Pyrococcus furiosus*.**

95 Values are from ICP-MS data and are expressed as mole atom/mole IssA monomer, assuming

96 pure IssA. Shown are the metals out of fifty-five measured by ICP-MS that gave values  $\geq 0.1$ .

97 Error bars indicate standard deviation of two independent ICP-MS runs.

98

99

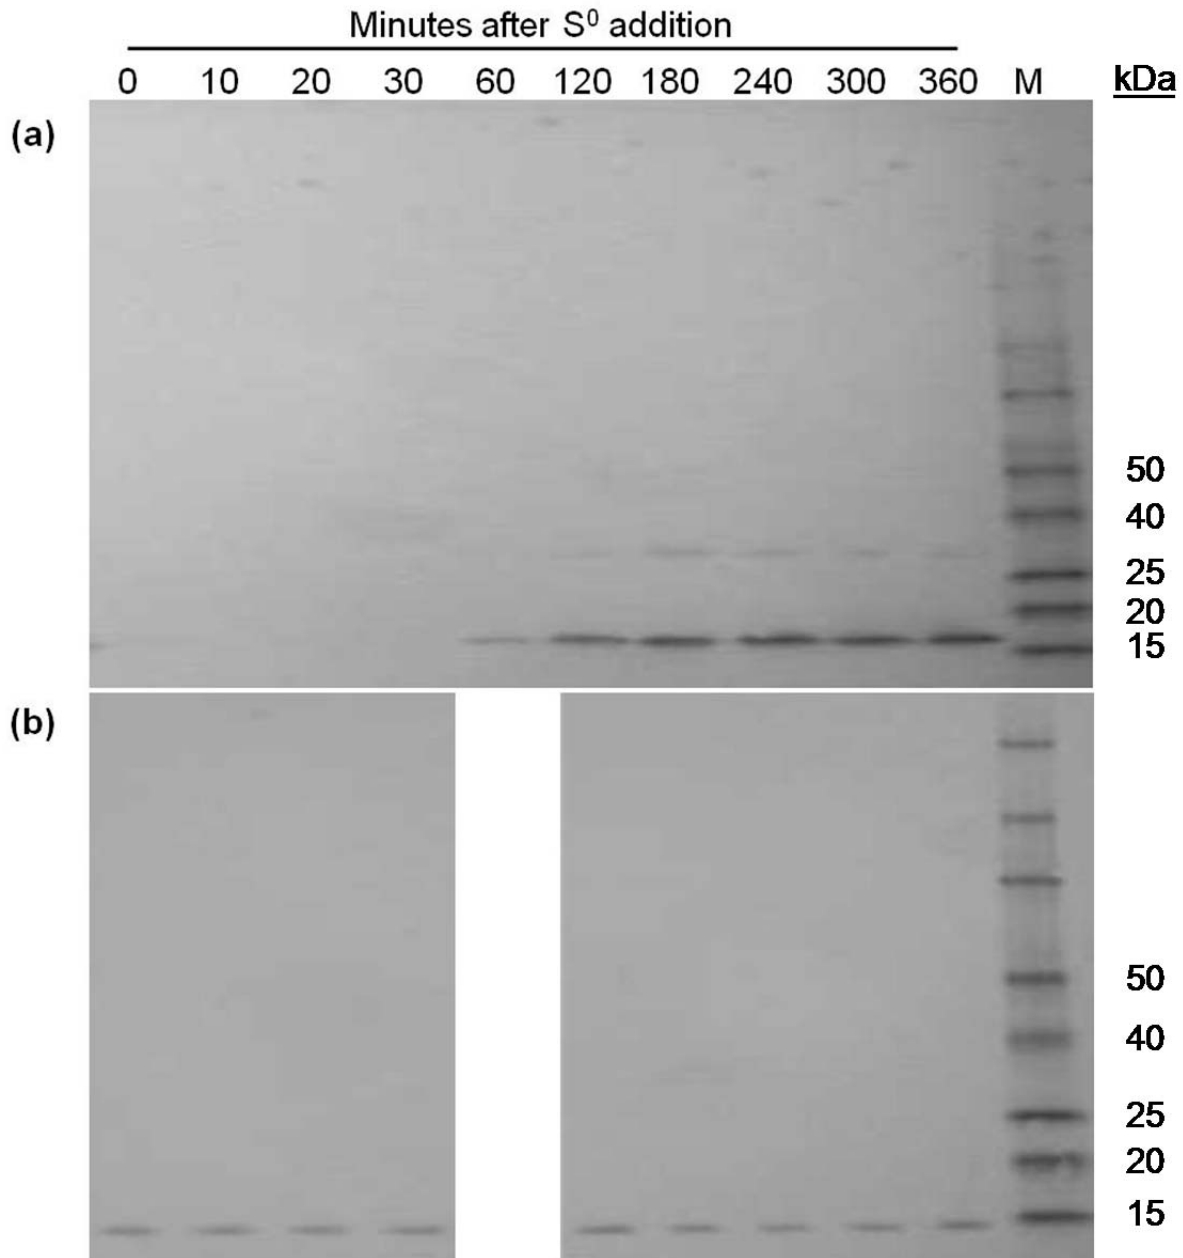

100

101

102 **Supplementary Figure 1. Western blot analysis of whole cell extract from *P. furiosus***  
 103 **grown on maltose medium after  $S^0$  addition at mid-log phase. Lanes are 0, 10, 20, 30, 60,**  
 104 **120, 180, 240, 300, and 360 minutes after  $S^0$  addition. (a) IssA antibody, (b) SOR antibody as a**  
 105 **loading control. M: protein standard marker.**

106



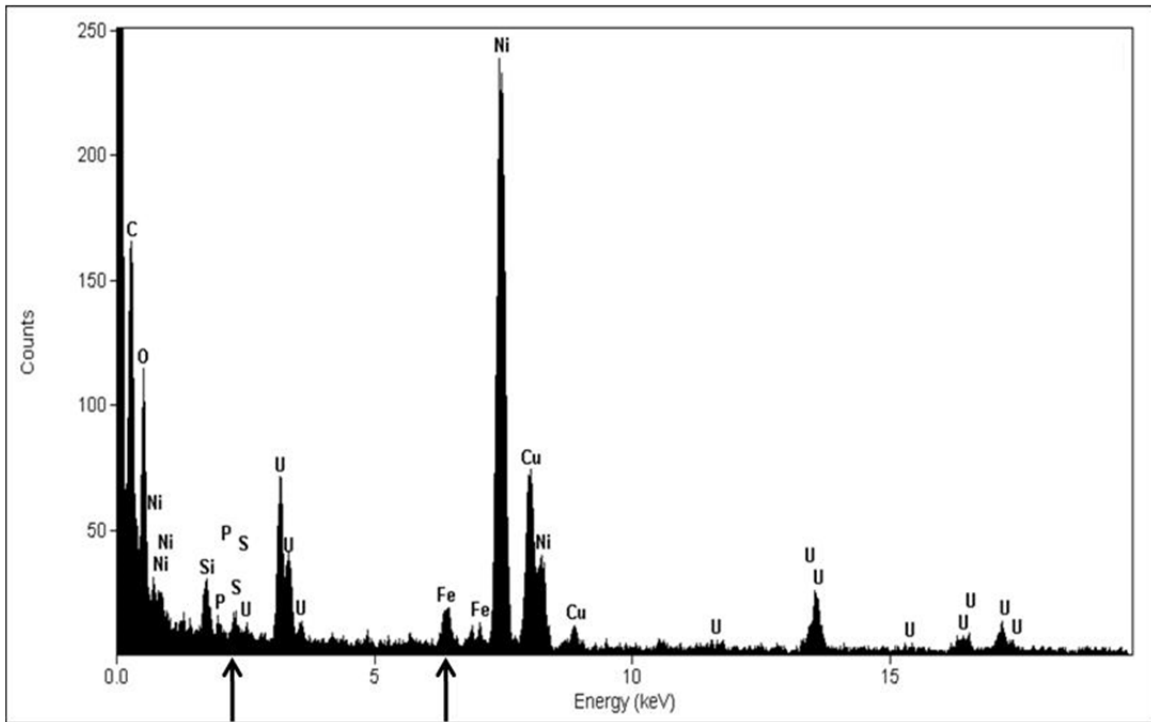

107

108

109 **Supplementary Figure 2. Energy dispersive X-ray analysis of an electron dense particle**  
110 **associated with IssA.** Element names are noted; nickel and copper are from the support grid  
111 and uranium was used to stain the cells. Arrows indicate the  $K\alpha$  energies of S at 2.47 keV and  
112 Fe at 7.11 keV.

113

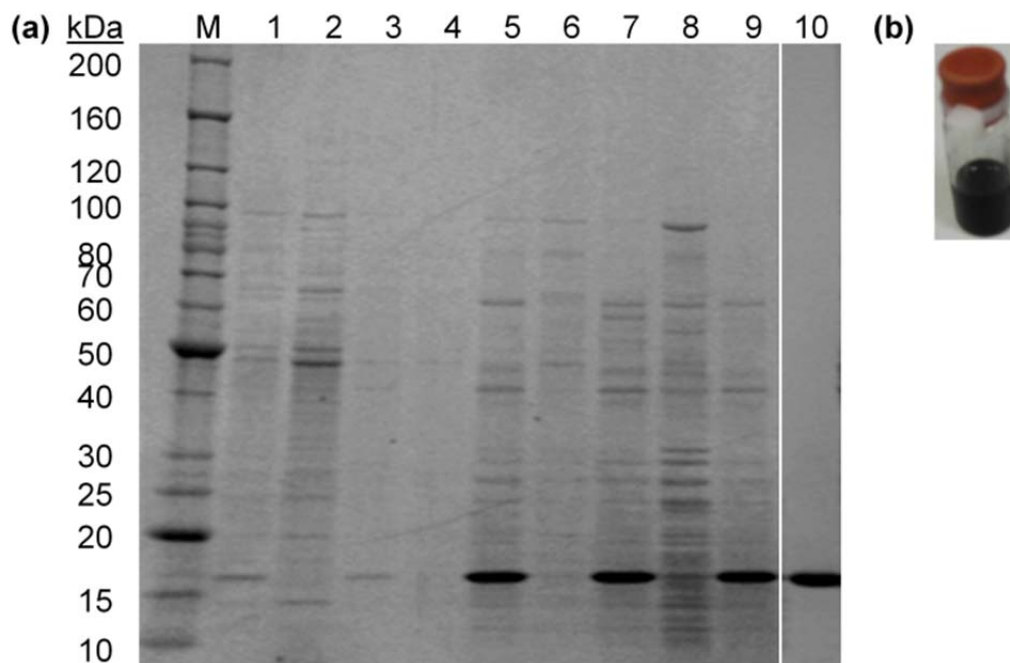

114

115

116 **Supplementary Figure 3. Issa purification from *Pyrococcus furiosus*.** (a) SDS-PAGE gel  
 117 showing Issa purification from cells grown on maltose with 2 g/L S<sup>0</sup>; Issa runs at approximately  
 118 17 kDa and was confirmed by MALDI-TOF mass spectrometry. M: protein size markers  
 119 (Invitrogen); lane 1: whole cell extract; lane 2-3: 100,000xg supernatant, pellet; lane 4-5: 1%  
 120 SDS-treated supernatant, pellet; lane 6-7: first wash supernatant, pellet; lane 8-9: second wash  
 121 supernatant, pellet; lane 10: final Issa sample after CsCl gradient and concentration. (b) Purified  
 122 Issa is black in color.

123

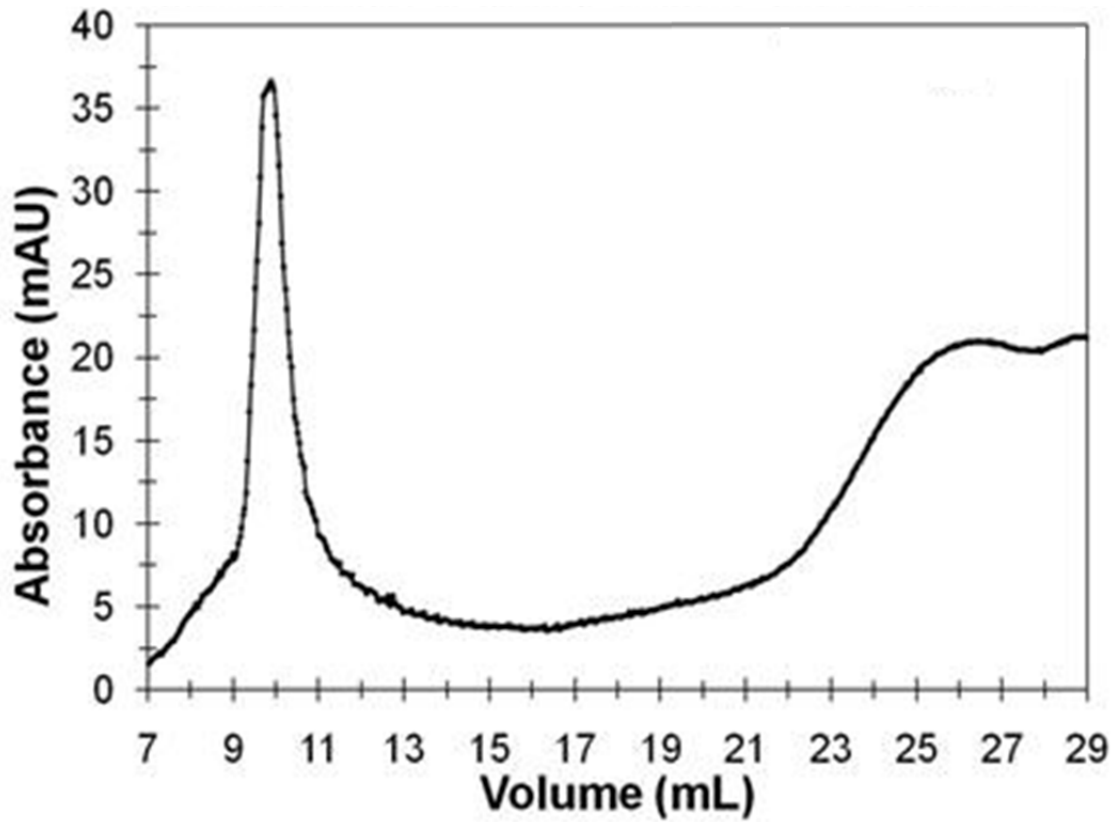

124

125

126

127 **Supplementary Figure 4. IssA molecular weight determination by size exclusion**  
128 **chromatography.** The molecular weight of IssA was estimated using analytical column  
129 chromatography (Sephacryl S-1000 SF) pre-equilibrated with 50 mM TrisHCl (pH 8.0), 300 mM  
130 NaCl, 1 mM DTT. Native IssA from *P. furiosus* eluted near the exclusion limit (100 MDa  
131 dextran).

132

133

134  
135  
136  
137  
138  
139  
140  
141  
142  
143  
144  
145  
146  
147  
148  
149  
150  
151  
152  
153  
154  
155  
156  
157  
158  
159  
160  
161  
162  
163  
164  
165  
166  
167  
168  
169  
170  
171  
172  
173  
174  
175

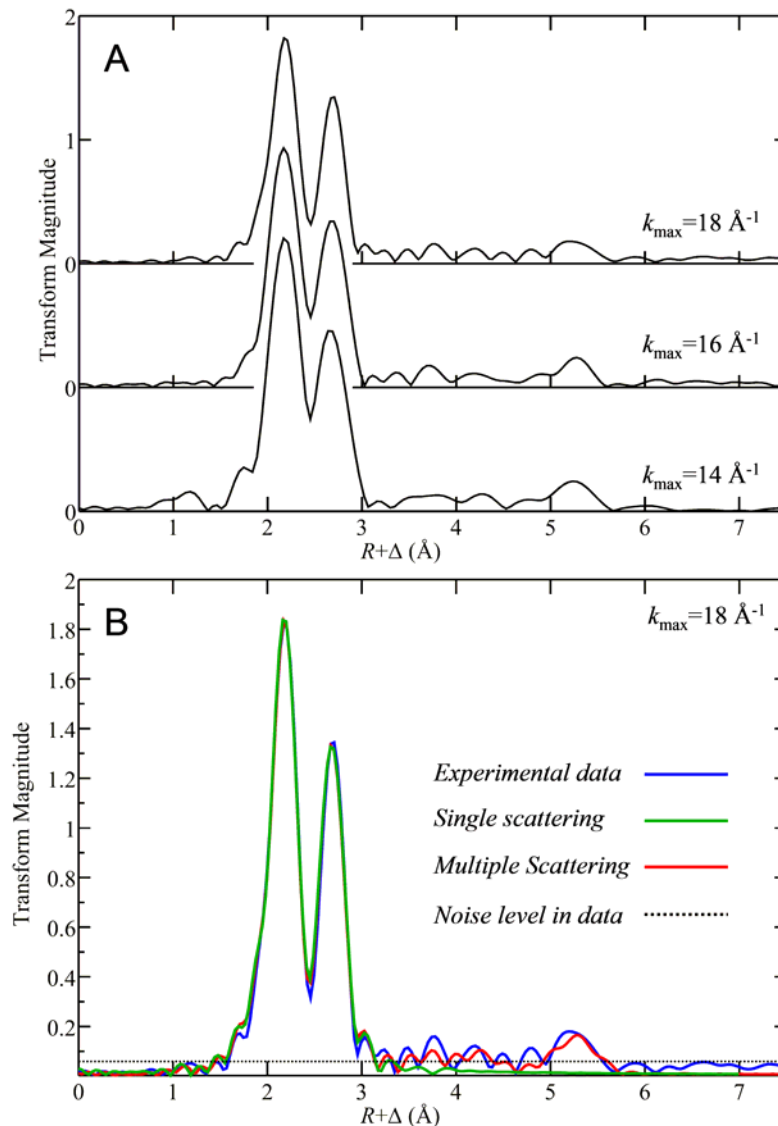

**Supplementary Figure 5. Detailed analysis of 5.4 Å iron EXAFS peak.** **A)** Shows EXAFS Fourier transforms (Fe—S phase-corrected) for different  $k$ -ranges showing persistence of the 5.4 Å transform peak. **B)** Shows the EXAFS Fourier transform of the high- $k$  data ( $18 \text{ \AA}^{-1}$ ) (blue line) modeled using multiple scattering (red line) or single scattering (green line) plus the estimated noise level in the data at this  $k$ -range (broken line). We note that the EXAFS noise level is expected to be “white” with equal amplitudes at all frequencies but that the noise at very low frequency will be effectively removed by the EXAFS spline function, which is why the apparent Fourier transform noise level falls below the broken line at low  $R$  values.

176  
177  
178  
179  
180  
181  
182  
183  
184  
185  
186  
187  
188  
189  
190  
191  
192  
193  
194  
195  
196  
197  
198  
199  
200  
201  
202  
203  
204  
205  
206  
207  
208

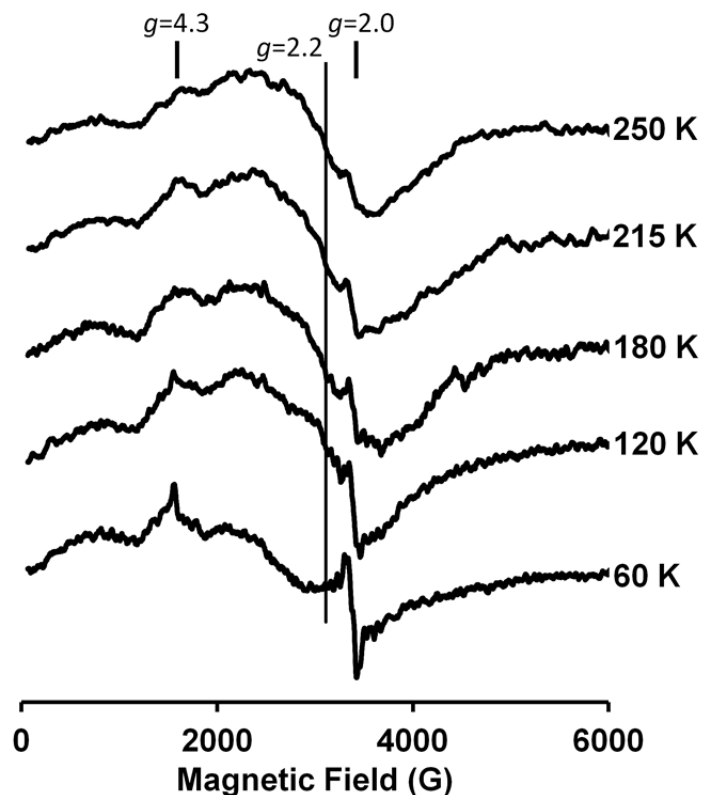

**Supplementary Figure 6. Temperature-dependence of the EPR spectra of IssA.** The spectra were recorded under non-power-saturating conditions at a microwave frequency of 9.60 GHz, with a modulation amplitude of 6.4 G and a microwave power of 20 mW. Broad scans at various temperatures show a very broad signal centered around  $g = 2.2$  (marked by the long vertical line) that increases in intensity with increasing temperature due to antiferromagnetic coupling in the thioferrate chains. The positions at  $g = 4.3$  and  $g = 2.0$  are marked. The former is indicative of trace adventitiously-bound high-spin ( $S = 5/2$ )  $\text{Fe}^{3+}$  or magnetically isolated linear  $[\text{3Fe-4S}]^+$  clusters ( $S = 5/2$ ). The origin of the weak signal in the  $g = 2$  region is unknown.

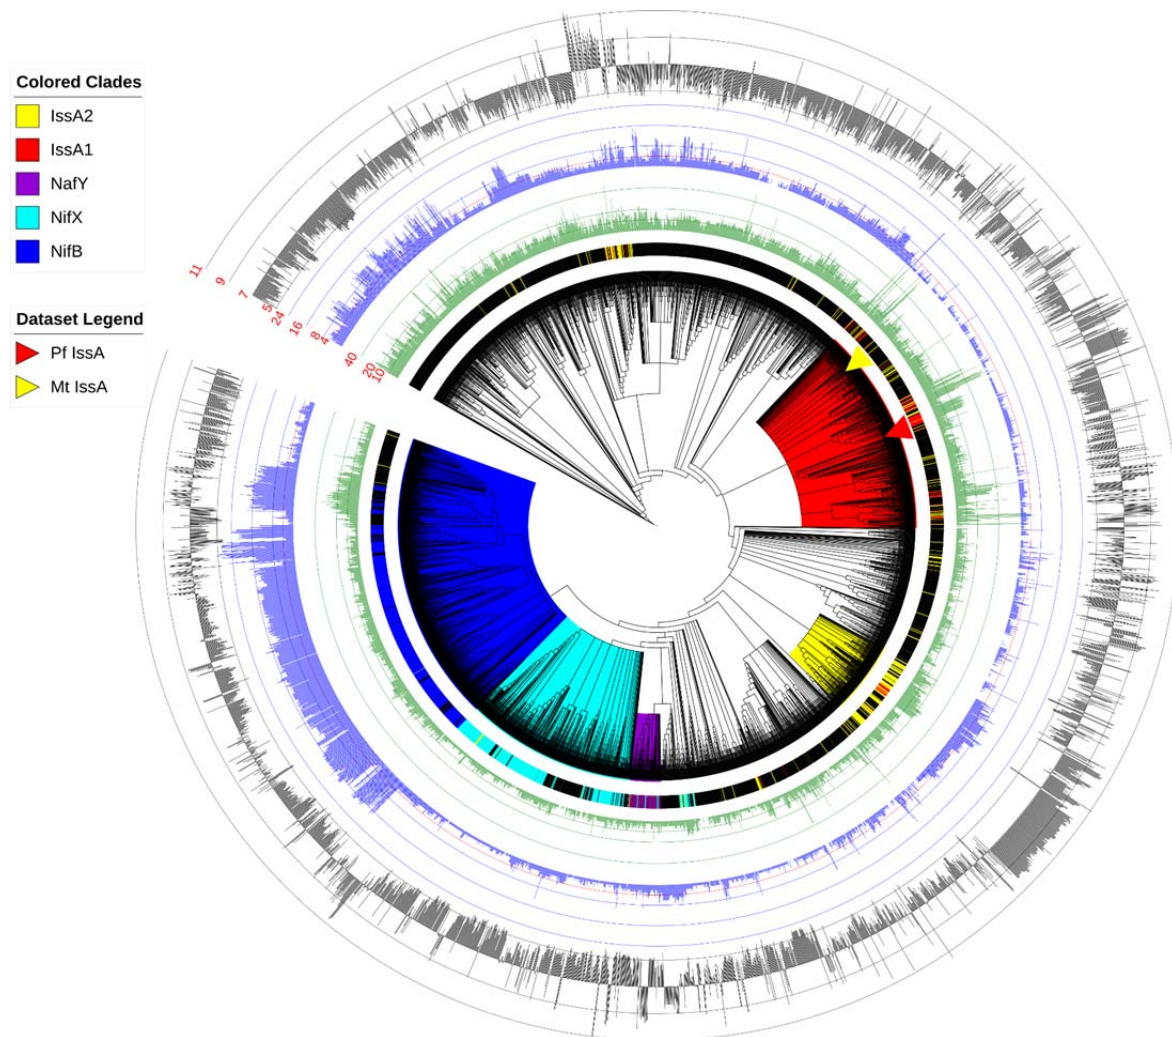

209  
 210  
 211  
 212  
 213  
 214  
 215  
 216  
 217  
 218  
 219  
 220  
 221  
 222  
 223  
 224  
 225  
 226  
 227

**Supplementary Figure 7. Cladogram of proteins containing the IPR003731 domain.** Colored clades contain members of the NifB (IPR005980, blue), NifX (IPR013480, turquoise), and NafY (IPR031763, yellow) InterPro protein families. The proposed IssA clade based on *P. furiosus* IssA (red) contains member proteins (red lines on innermost ring) with  $pI \geq 9$ , fewer than 5 cysteines and at least 20% glycine in the C-terminal 40 residues, similar to IssA including the C-terminal tail. The IssX clade (78% confidence; yellow) shares some of these features, but is more distantly related to *P. furiosus* IssA and contains member proteins (yellow lines on innermost ring) with  $pI \geq 8$ , fewer than 10 cysteines and at least 10% glycine residues in the last 40 amino acids. Many members of this clade appear to contain a shortened version of the *P. furiosus* IssA C-terminal tail. Blue, green and purple lines on the innermost ring mark individual members of IPR005980, IPR013480 and IPR031763, respectively. The second ring (green) plots the percentage of glycine in the last 40 residues. The third ring (blue) plots the number of cysteines in the protein where the red scale line shows 4 cysteines. The outer ring (black) plots predicted protein pI centered at pH 7.0. *P. furiosus* IssA and the *Methanothermobacter thermautotrophicus* homolog (MTH1175) used to predict the structure of the *P. furiosus* N-terminal domain (Fig. 6a), are shown by red and yellow arrowheads, respectively.

228

229

230

231

232

233

234

235

236

237

238

239

240

241

242

243

244

245

246

247

248

249

250

251

252

253

254

255

256

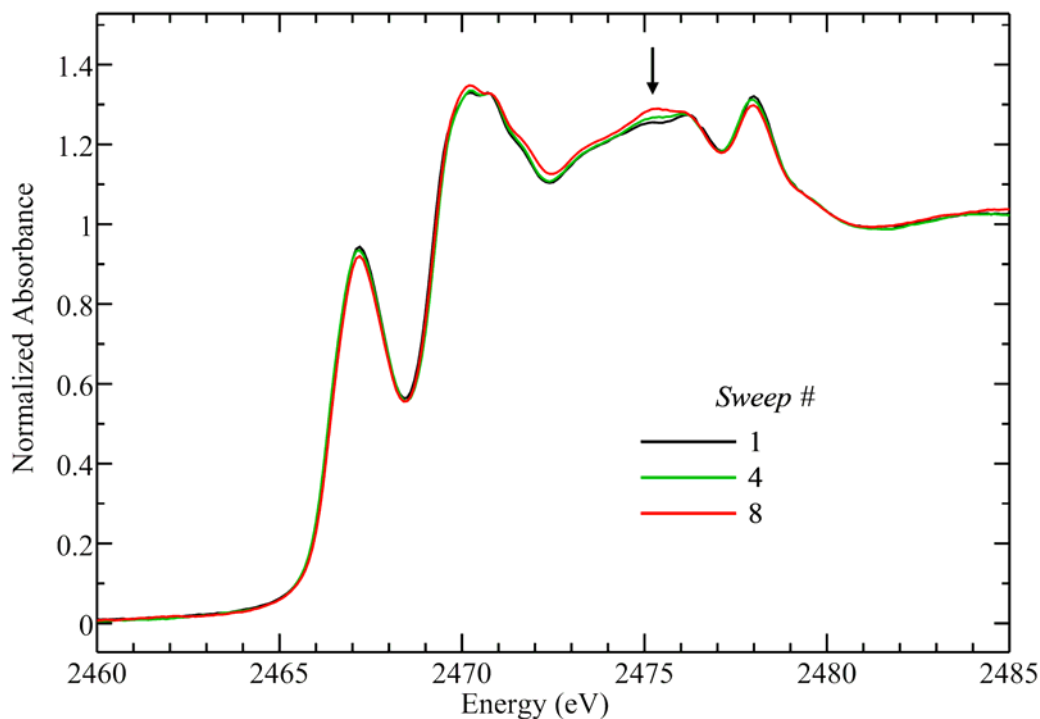

**Supplementary Figure 8. Effects of extended X-ray beam exposure on the sulfur K-edge XAS spectrum of a single IssA sample.** Spectra are shown for the first scan, the fourth scan and the eighth scan with each scan taking approximately 30 min. Only subtle changes in the near-edge spectrum are observed in this sample and these are most pronounced at around 2475 eV (indicated by the arrow), suggesting that photo-oxidation of a small fraction of the sample has occurred.

257 **Supplementary References**

- 258 1. Pickering, I. J., Prince, R. C., Divers, T. & George, G. N. Sulfur K-edge X-ray absorption  
259 spectroscopy for determining the chemical speciation of sulfur in biological systems.  
260 *FEBS Lett.* **441**, 11-14 (1998).
- 261 2. George, G. N. *et al.* X-ray-induced photo-chemistry and X-ray absorption spectroscopy  
262 of biological samples. *J. Synchrotron Radiat.* **19**, 875-886 (2012).
- 263 3. George, M. XAS-Collect: a computer program for X-ray absorption spectroscopic data  
264 acquisition. *J. Synchrotron Radiat.* **7**, 283-286 (2000).
- 265 4. Sievers, F. *et al.* Fast, scalable generation of high-quality protein multiple sequence  
266 alignments using Clustal Omega. *Mol. Syst. Biol.* **7** (2011).
- 267 5. Capella-Gutiérrez, S., Silla-Martínez, J. M. & Gabaldón, T. trimAl: A tool for automated  
268 alignment trimming in large-scale phylogenetic analyses. *Bioinformatics* **25**, 1972-1973  
269 (2009).
- 270 6. Minh, B. Q., Nguyen, M. A. T. & von Haeseler, A. Ultrafast Approximation for  
271 Phylogenetic Bootstrap. *Mol. Biol. Evol.* **30**, 1188-1195 (2013).
- 272 7. Letunic, I. & Bork, P. Interactive Tree Of Life v2: Online annotation and display of  
273 phylogenetic trees made easy. *Nucleic Acids Res.* **39**, W475-478 (2011).
- 274 8. Gasteiger, E. *et al.* in *The Proteomics Protocols Handbook* (ed John M. Walker) 571-  
275 607 (Humana Press, 2005).
- 276 9. Bjellqvist, B. *et al.* The focusing positions of polypeptides in immobilized pH gradients  
277 can be predicted from their amino acid sequences. *Electrophoresis* **14**, 1023-1031 (1993).



278 10. Kelley, L. A., Mezulis, S., Yates, C. M., Wass, M. N. & Sternberg, M. J. E. The Phyre2  
279 web portal for protein modeling, prediction and analysis. *Nat. Protocols* **10**, 845-858  
280 (2015).  
281
